# Supplementary material for: Band-gap tuning of N-doped TiO2 photocatalysts for visible-light-driven selective oxidation of alcohols to aldehydes in water
Source: Royal Society of Chemistry journal article supplement (doi:10.1039/c3ra40518d), 2013-01-01

**Supporting Information**  
**For**  
**Band-gap tuning of N-doped TiO<sub>2</sub> photocatalyst for**  
**visible-light-driven selective oxidation of alcohol to aldehydes in**  
**water**

Zizhong Zhang\*, Zhishan Luo, Zhiping Yang, Shuying Zhang, Yu Zhang, Yangen

Zhou, Xuxu Wang\*, Xianzhi Fu

*Research Institute of Photocatalysis, State Key Laboratory Breeding Base of  
Photocatalysis, Fuzhou University, Fuzhou, China, 350002*

E-Mail: [z.zhang@fzu.edu.cn](mailto:z.zhang@fzu.edu.cn); [xwang@fzu.edu.cn](mailto:xwang@fzu.edu.cn)

Tel: +86-591-83690891; fax: +86-591-83738608.

### Preparation of N-doped TiO<sub>2</sub> samples

Titanium dioxide samples were synthesized by a sol-gel technique. A specific amount of titanium ethoxide was dissolved in redistilled ethanol to get a concentration of 0.1 mol·L<sup>-1</sup>. The precursor solution was added dropwise into water to hydrolysis under vigorous stirring. The amorphous precipitates were washed with distilled water, dried at 80 °C, and then calcined at 450 °C for 20 h in a flowing O<sub>2</sub> to remove residual organic compounds. Fourier transformed infrared (FTIR) spectra confirmed no residual organic compounds in TiO<sub>2</sub> samples. The as-prepared TiO<sub>2</sub> was heated in pure NH<sub>3</sub> gas stream at 400, 450, 500, 550, 650, 700 or 800 °C for 20 h to produce a series of N-doped TiO<sub>2</sub> samples with various N contents.

### Photocatalytic activity testing

The photoreactivity runs were performed in a test tube (45 ml) with 5 ml H<sub>2</sub>O, 100 μmol benzyl alcohol (BA) and 20 mg photocatalysts in the presence of O<sub>2</sub> using a 300-W Xe arc lamp equipped with a λ ≥ 420 nm cutoff filter and an IR filter for 2 hour illumination reaction. The reaction solution was analyzed by HPLC (Waters 2487, which was equipped with an Agilent Zorbax SB-C18 column). All products were quantified using the external standard method. For the photocatalytic selective oxidation of cyclohexanol, the reaction solution was analyzed by GC with an FID detector. The conversion of alcohols and the selectivity to their corresponding aldehydes were calculated as follows:

$$\text{Conversion (\%)} = (C_0 - C_A)/C_0 \times 100\%$$

$$\text{Selectivity (\%)} = C_{AD}/(C_0 - C_A) \times 100\%$$

where C<sub>0</sub> is the initial concentration of alcohols, C<sub>A</sub> and C<sub>AD</sub> are the concentration of alcohols and aldehydes after photocatalytic reaction, respectively.

**Figure S1.** Photocatalytic oxidation of benzyl alcohol into benzaldehyde on a  $\text{TiO}_{1.966}\text{N}_{0.034}$  catalyst. Benzyl alcohol conversion, benzaldehyde selectivity and the total organic carbon (TOC) with reaction time.

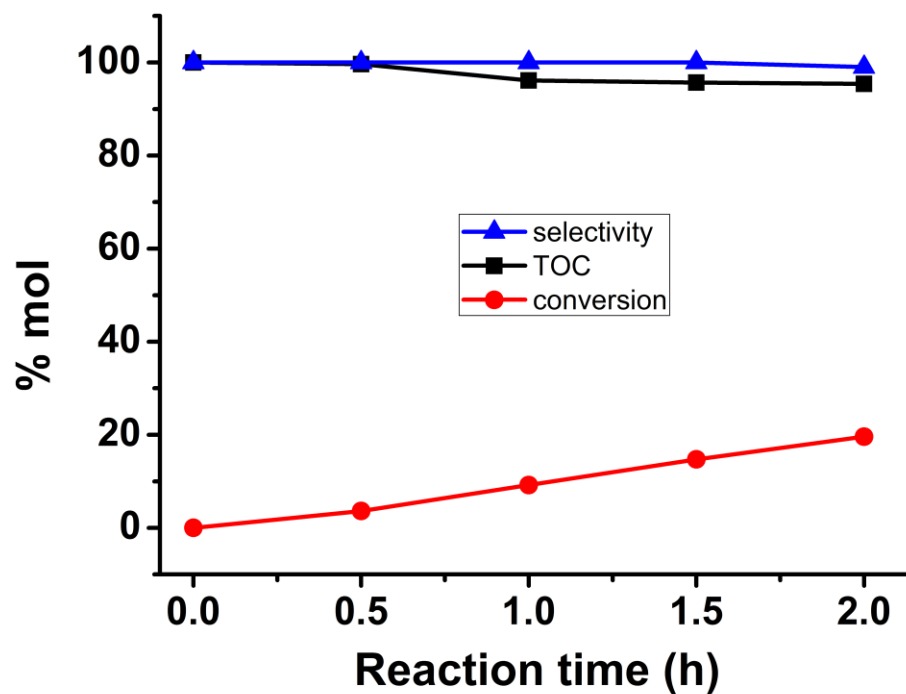

**Figure S2.** Wavelength dependence of the BA conversion on the  $\text{TiO}_{1.966}\text{N}_{0.034}$  catalyst.

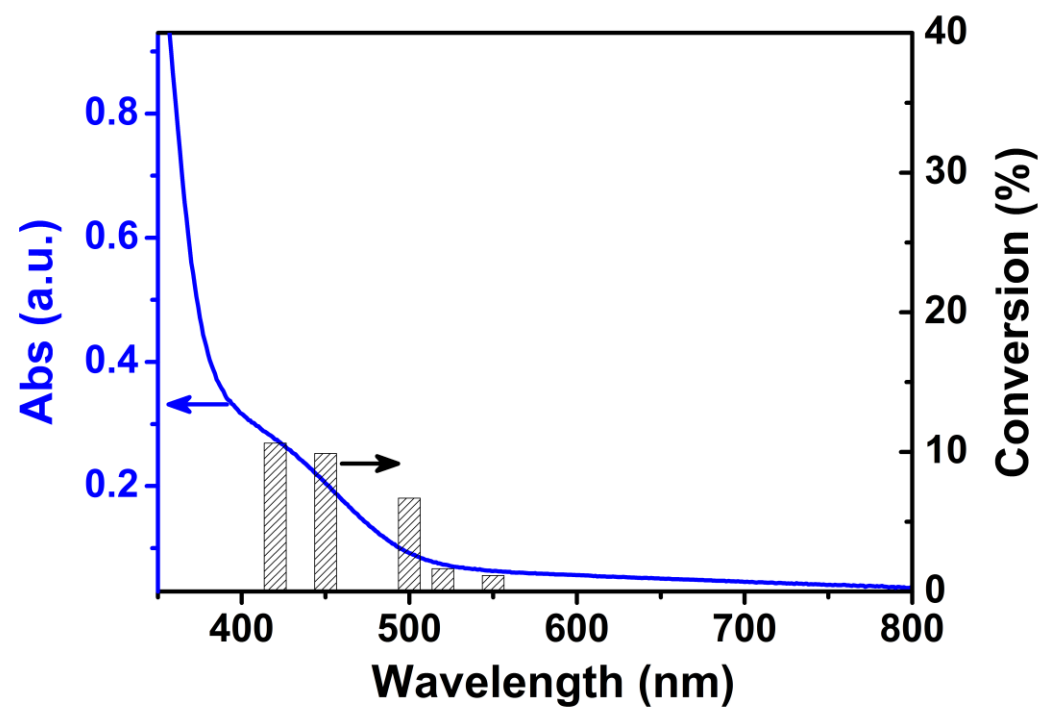

**Figure S3.** UV-vis absorption spectra of: (a)  $\text{TiO}_2$  by itself; (b)  $\text{TiO}_2$ -adsorbed BA; (c)  $\text{TiO}_{2-x}\text{N}_x$  by itself; and (d)  $\text{TiO}_{2-x}\text{N}_x$ -adsorbed BA.

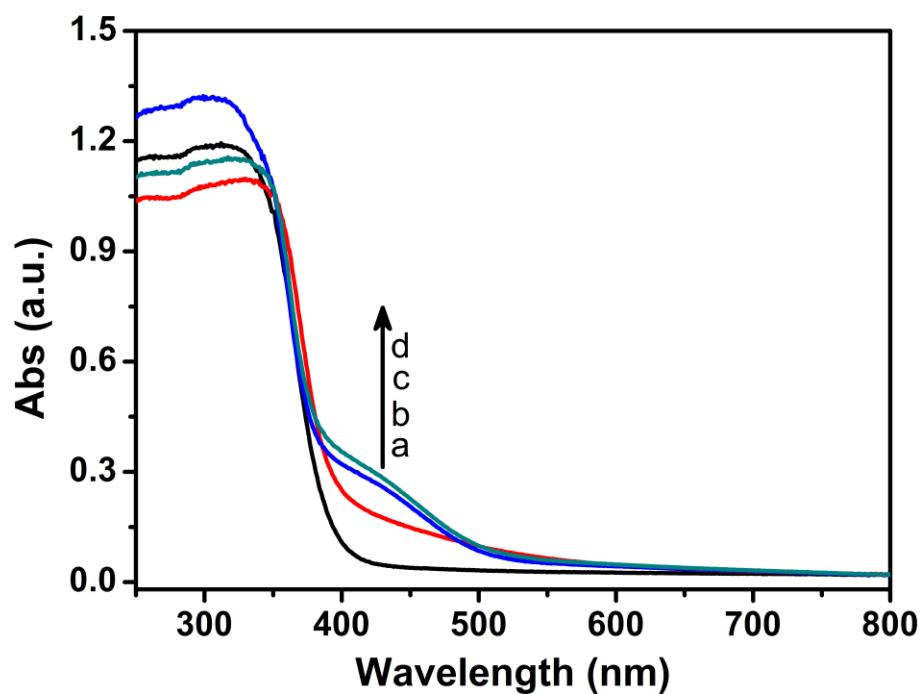

**Figure S4.** UV visible diffused reflectance spectrum of various  $\text{TiO}_{2-x}\text{N}_x$  samples: a,  $x = 0$ ; b,  $x = 0.025$ ; c,  $x = 0.034$ ; d,  $x = 0.036$ .

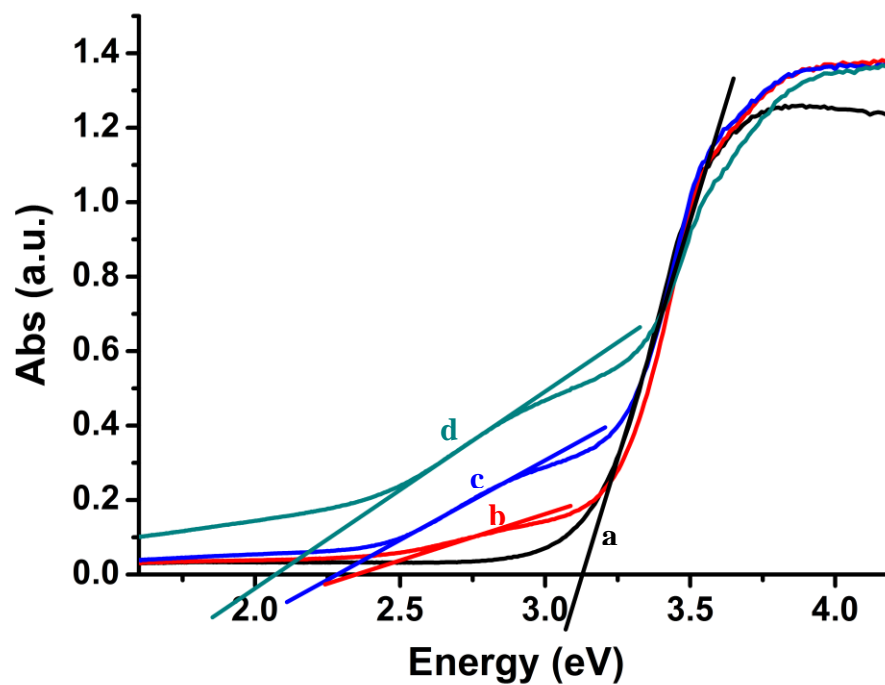

**Figure S5.** The intensity of DMPO-OOH/O<sub>2</sub><sup>•-</sup> signals in EPR spectra with irradiation time over various TiO<sub>2-x</sub>N<sub>x</sub> samples: a, x = 0.020; b, x = 0.025; c, x = 0.034; d, x = 0.036; e, x = 0.101.

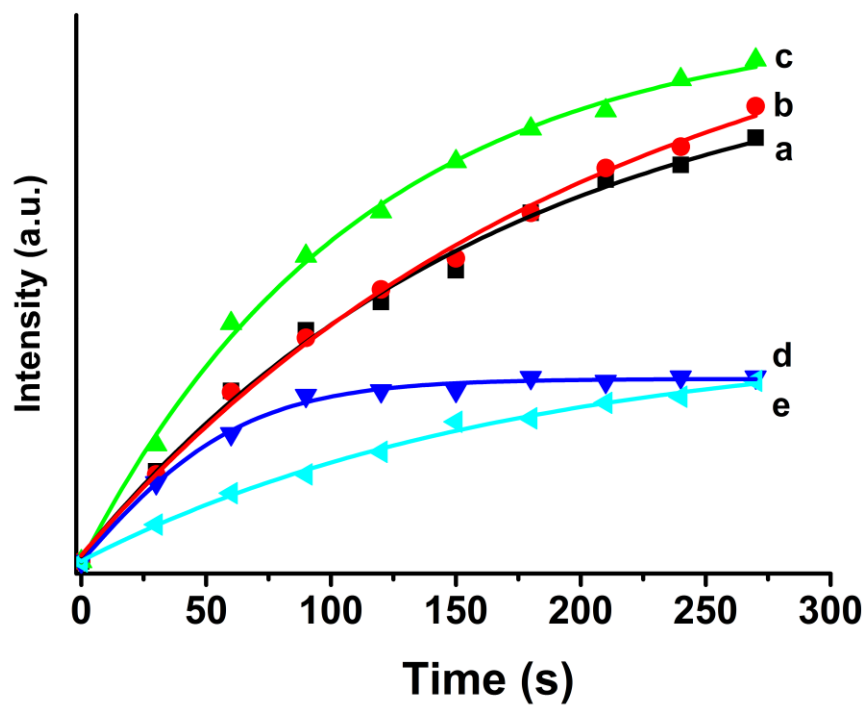

Supplement: c3ra40518d.pdf [file c3ra40518d.pdf]
